# Supplementary material for: Conversion of fructose into 5-hydroxymethylfurfural catalyzed by recyclable sulfonic acid-functionalized metal–organic frameworks
Source: Royal Society of Chemistry journal article supplement (doi:10.1039/c3gc42414f), 2014-01-01
Supplement: c3gc42414f.pdf [file c3gc42414f.pdf]

## Supporting Information

### **Conversion of Fructose into 5-Hydroxymethylfurfural Catalyzed by Recyclable Sulfonic Acid–Functionalized Metal–Organic Frameworks**

Jinzhu Chen,<sup>\*a</sup> Kegui Li,<sup>a,c</sup> Limin Chen,<sup>b</sup> Ruliang Liu,<sup>a,c</sup> Xing Huang<sup>a,b</sup> and Daiqi Ye<sup>b</sup>

<sup>a</sup> CAS Key Laboratory of Renewable Energy, Guangzhou Institute of Energy Conversion, Chinese Academy of Sciences, Guangzhou 510640 (PR China), Tel./Fax: (+86)20-3722-3380, E-mail: [chenjz@ms.giec.ac.cn](mailto:chenjz@ms.giec.ac.cn)

<sup>b</sup> Guangdong Provincial Key Laboratory of Atmospheric Environment and Pollution Control, College of Environment and Energy, South China University of Technology, Guangzhou 510006 (PR China)

<sup>c</sup> University of Chinese Academy of Sciences, Beijing 100049 (PR China)

## Preparation of MOFs

**MIL-101(Cr):** A solution containing  $\text{Cr}(\text{NO}_3)_3 \cdot 9\text{H}_2\text{O}$  (4.00 g, 10 mmol), 1,4-benzenedicarboxylic acid (1.66 g, 10 mmol), hydrofluoric acid (0.43 mL, 40 % solution in water) and  $\text{H}_2\text{O}$  (48 mL) was introduced in a 100 mL Teflon-liner. The mixture was heated to 220 °C in an autoclave for 8 h. The crystalline MIL-101 product in the solution was doubly filtered off using two glass filters with a pore size between 40 and 100  $\mu\text{m}$  to remove the free terephthalic acid. Then a solvothermal treatment was sequentially performed using ethanol (95 % EtOH with 5 % water) at 70 °C for 24 h. The resulting solid was soaked in 1 M of  $\text{NH}_4\text{F}$  solution at 70 °C for 24 h and immediately filtered, washed with hot water. The solid was finally dried overnight at 50 °C under air atmosphere. (Lit. Y. K. Hwang, D. Y. Hong, J. S. Chang, S. H. Jhung, Y. K. Seo, J. Kim, A. Vimont, M. Daturi, C. Serre, G. Férey, *Angew. Chem., Int. Ed.* **2008**, 47, 4144–4148.)

**UIO-66(Zr):** Typical synthesis of UIO-66(Zr) was performed by dissolving  $\text{ZrCl}_4$  (1.40 g, 6 mmol) and 1,4-benzenedicarboxylic acid (1 g, 6 mmol) in DMF (60 mL) at room temperature. The thus obtained mixture was sealed and placed in a preheated oven at 120 °C for 16 h. Crystallization was carried out under static conditions. After cooling in air to room temperature, the resulting solid was filtered, repeatedly washed with DMF and dried at room temperature. (Lit. V. Guillerm, F. Ragon, M. Dan-Hardi. *Angew. Chem. Int. Ed.* **2012**, 51, 9267–9271.)

**MIL-53(Al):** The synthesis was carried out under mild hydrothermal conditions using  $\text{Al}(\text{NO}_3)_3 \cdot 9\text{H}_2\text{O}$  (5.20 g), 1,4-benzenedicarboxylic acid (BDC, 1.152 g), and deionized water (20 mL). The reaction was performed in a 100 mL Teflon-liner for three days at 220 °C. After filtering off and washing with deionized water, the solid was purified upon heating in air (330 °C, 3 days). At this temperature, the unreacted BDC species and the occluded BDC molecules contained in the structure are expelled. (Lit. T. Loiseau, C. Serre, C. Huguenard, G. Fink, F. Taulelle, M. Henry, T. Bataille, G. Férey, *Chem. Eur. J.* **2004**, 10, 1373–1382.)

**PTA/MIL-101(Cr) (PTA 33.8 wt%):** A solution of  $\text{Cr}(\text{NO}_3)_3 \cdot 9\text{H}_2\text{O}$  (4 g, 10 mmol), PTA (3.0 g), and hydrofluoric acid (0.44 mL, 10 mmol) in water (48 mL) was stirred for 10 min and then 1,4-benzenedicarboxylic acid (1.6 g, 10 mmol) was added to the mixture. The solution pH was adjusted to 1 by addition of NaOH. This mixture was placed in an autoclave and heated to 220 °C for 8 h. After cooling, the reaction mixture was filtered and the solid was extracted by a Soxhlet extractor in methanol overnight, dispersed in 96 % ethanol, and heated at 100 °C for 20 h in a Teflon-lined autoclave. The resulting solid was filtered, dried at 60 °C in an oven, and denoted as PTA/MIL-101(Cr) (PTA 33.8 wt%). (Lit. Y. Zhang, V. Degirmenci, C. Li, E. J. M. Hensen, *ChemSusChem* **2011**, 4, 59–64.)

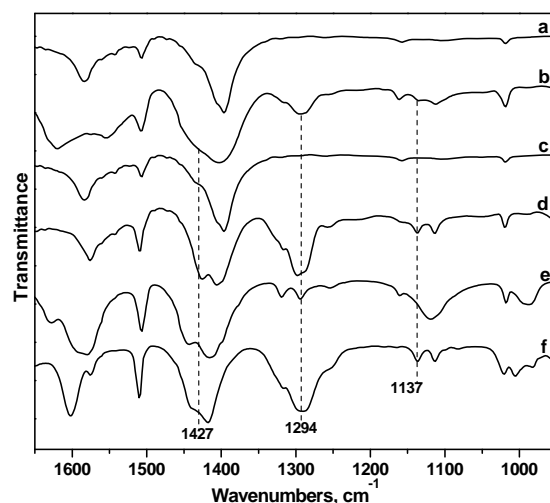

**Figure S1.** FTIR of (a) MIL-101(Cr), (b) MIL-101(Cr)-SO<sub>3</sub>H (15.0%), (c) UIO-66(Zr), (d) UIO-66(Zr)-SO<sub>3</sub>H (9.5%), (e) MIL-53(Al), and (f) MIL-53(Al)-SO<sub>3</sub>H (8.2%).

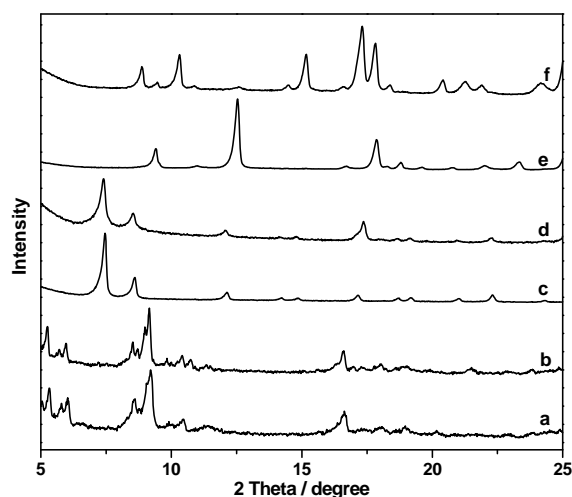

**Figure S2.** XRD patterns of (a) MIL-101(Cr), (b) MIL-101(Cr)-SO<sub>3</sub>H (15.0%), (c) UIO-66(Zr), (d) UIO-66(Zr)-SO<sub>3</sub>H (9.5%), (e) MIL-53(Al), and (f) MIL-53(Al)-SO<sub>3</sub>H (8.2%).

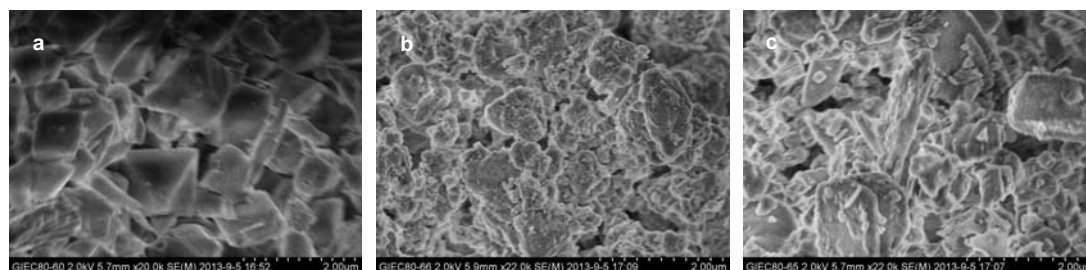

**Figure S3.** SEM images of (a) MIL-101(Cr)-SO<sub>3</sub>H (15.0%), (b) UIO-66(Zr)-SO<sub>3</sub>H (9.5%), and (c) MIL-53(Al)-SO<sub>3</sub>H (8.2%).
